# Supplementary material
Source: HighWire-hosted journal article supplement (https://mbio.asm.org/content/5/3/e01105-14)
Supplement: inline-supplementary-material-3 [file inline-supplementary-material-3.pdf]

Figure S2

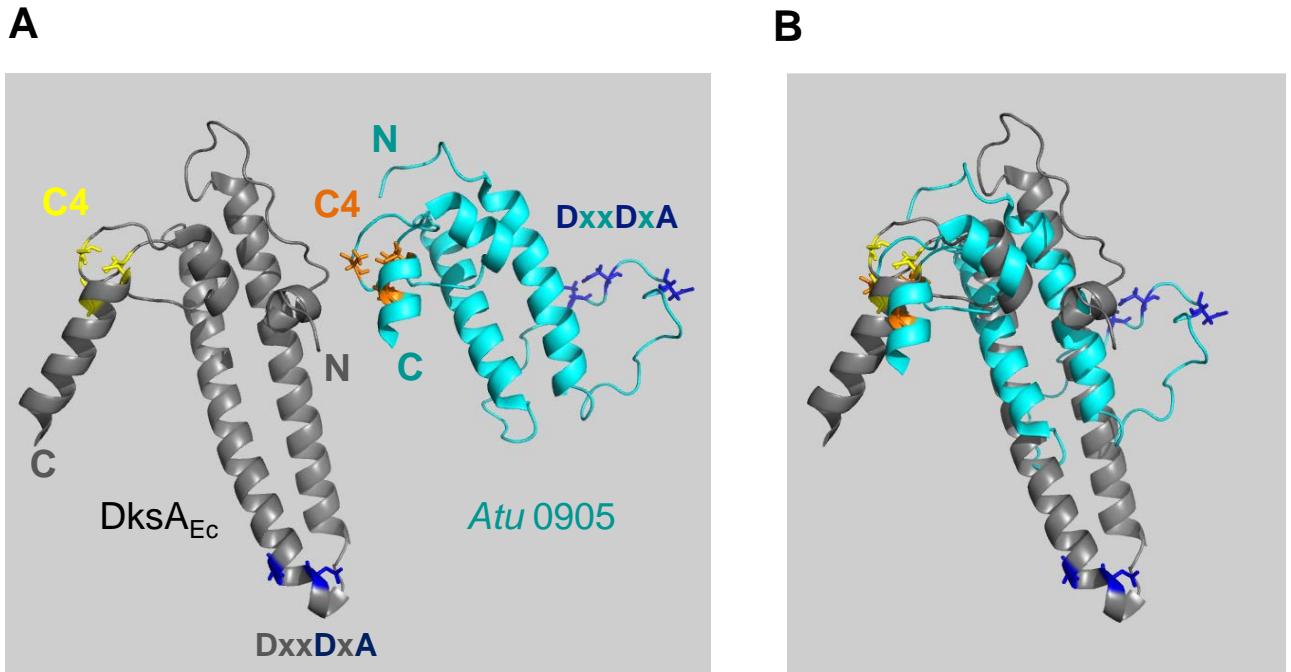

**C**

|                                                   |     |                                                                           |     |
|---------------------------------------------------|-----|---------------------------------------------------------------------------|-----|
| DksA <sub>Ec</sub>                                | 46  | AWRNQLRDEVDRTVTHMQDEAAANFPDPVDRAAQEEFSLLELRNRDRERKLIKKEIKTLKK             | 105 |
| RSP0166                                           | 11  | LEARLADLGARLEGIEAELDSHNSRDWEELATERETEEVLEGMGTSGQQEIRAITAALAR              | 70  |
| Atu0905                                           | 16  | LRDRQRELYRRLHKIEADFEEPRNPDDEDRA <del>SERSNDEV</del> LDELGQVGQDELRAIDAALAR | 75  |
| DxxDxA Motif                                      |     |                                                                           |     |
| DksA <sub>Ec</sub>                                | 106 | VEDEDFGYCESCGVEIGIRLLEARPTADLCIDCKT                                       | 140 |
| RSP0166                                           | 71  | IDADEYGF <del>CVKCGAE</del> IGEARLDVLPYTPFCRK <del>CAG</del>              | 105 |
| Atu0905                                           | 76  | IASGT <del>FGT</del> CVKCGKRI <del>SEDRL</del> KAVPYTPFCQECAAAL           | 112 |
| <hr style="width: 20%; margin: auto;"/> Zn-finger |     |                                                                           |     |
